# Supplementary material
Source: PubMed Central journal article supplement (PMC4118304)

gatB

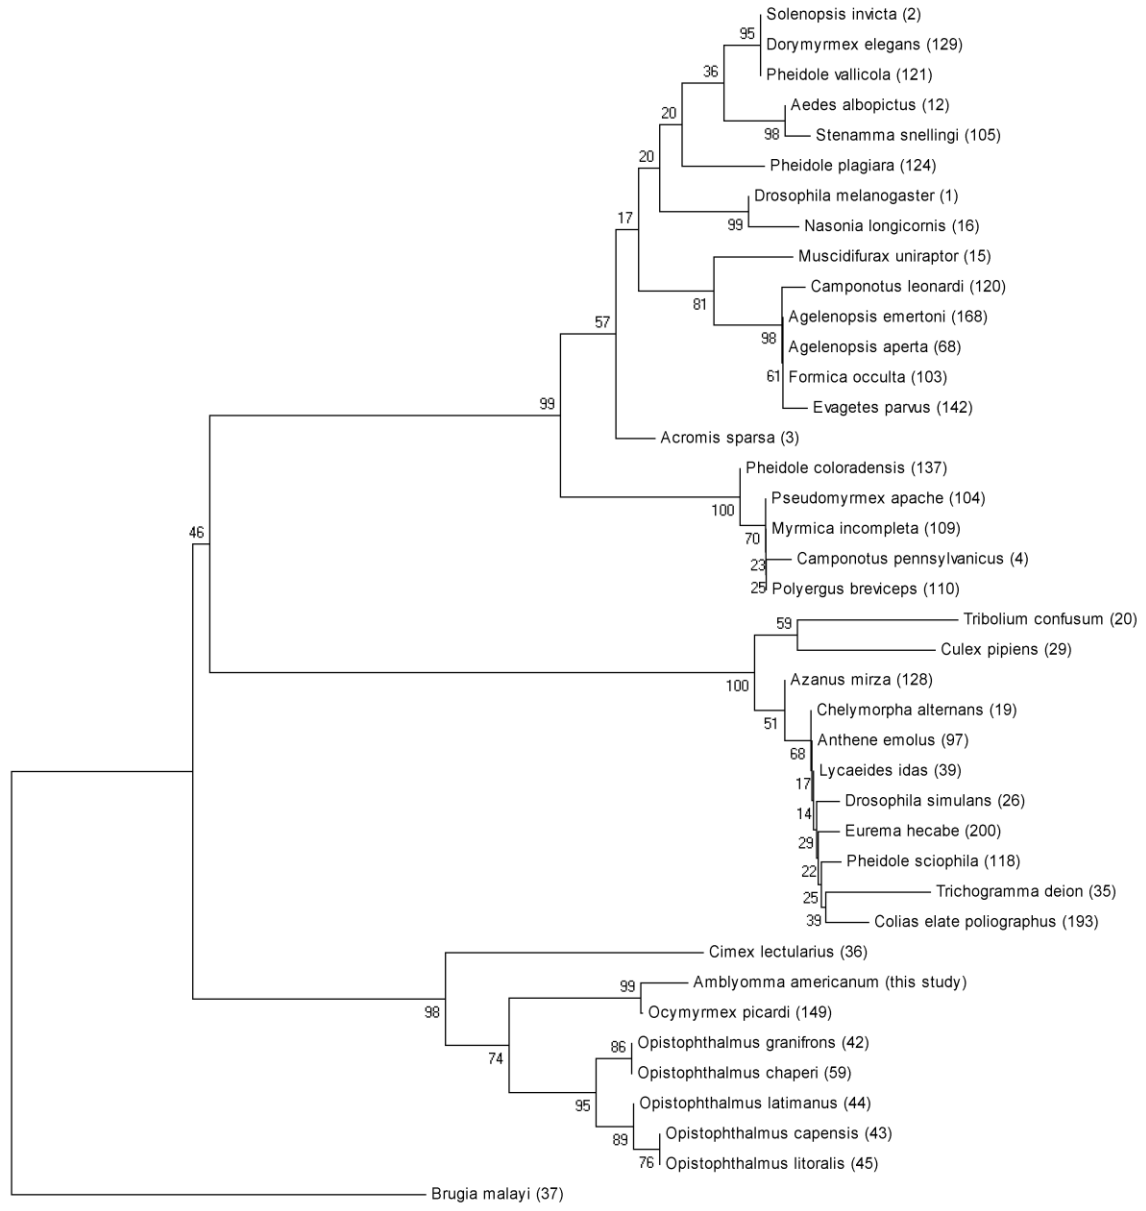

0.01

coxA

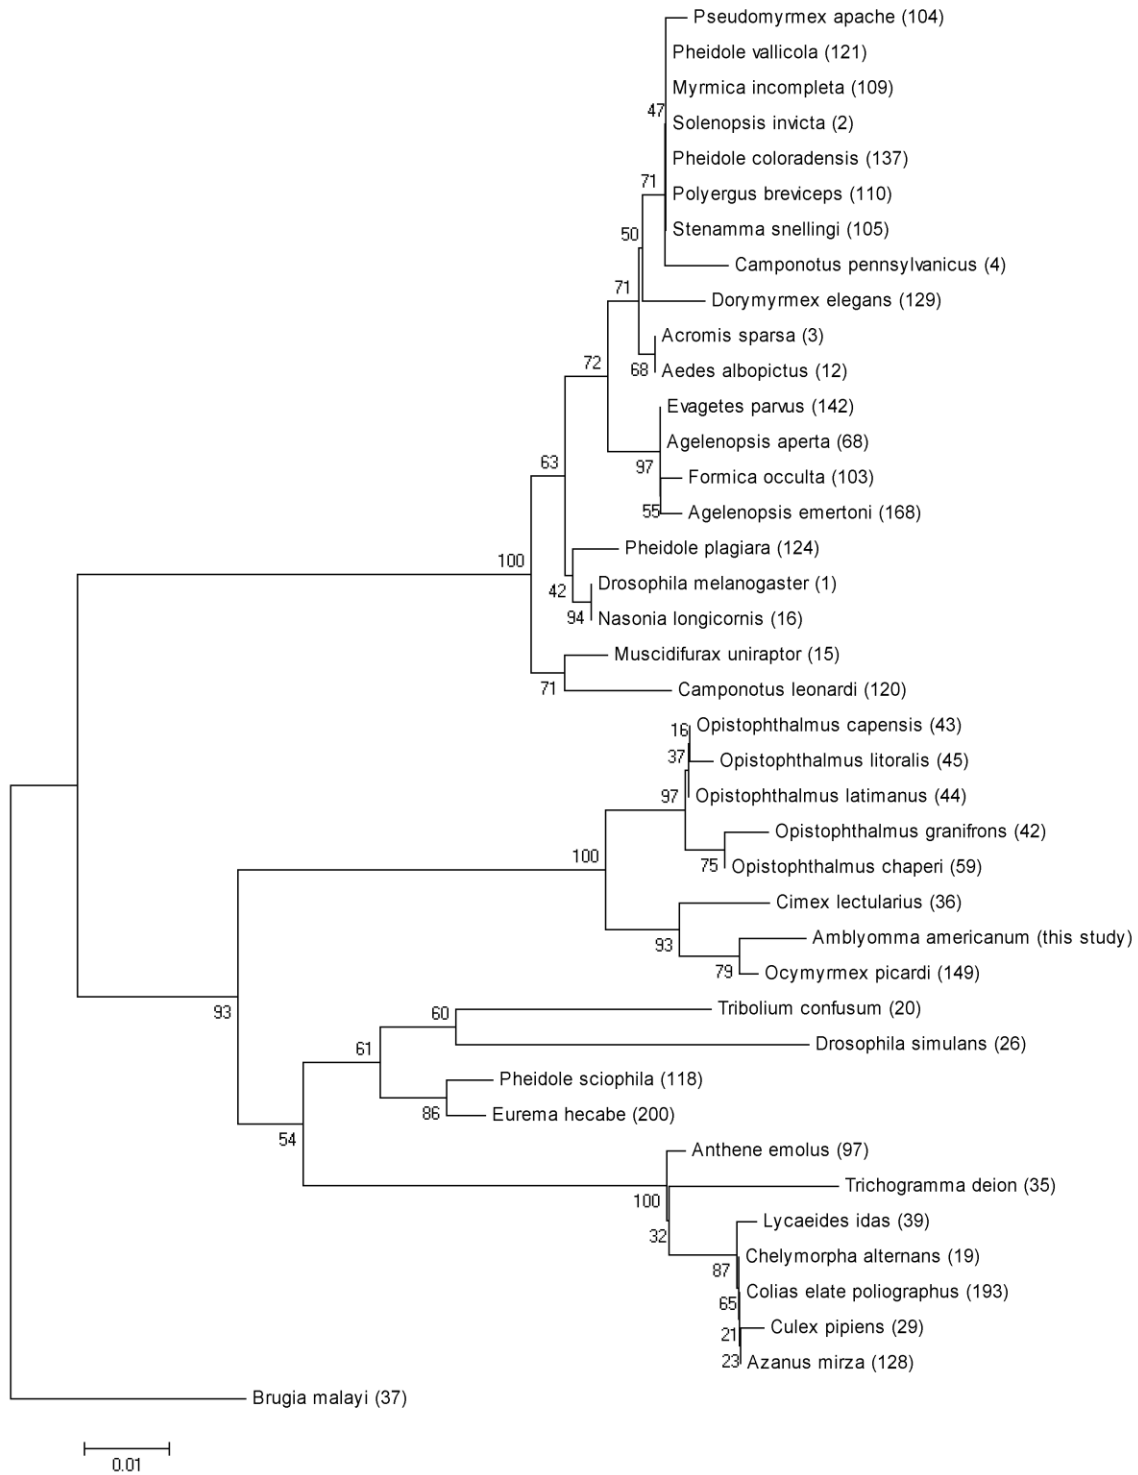

hcpA

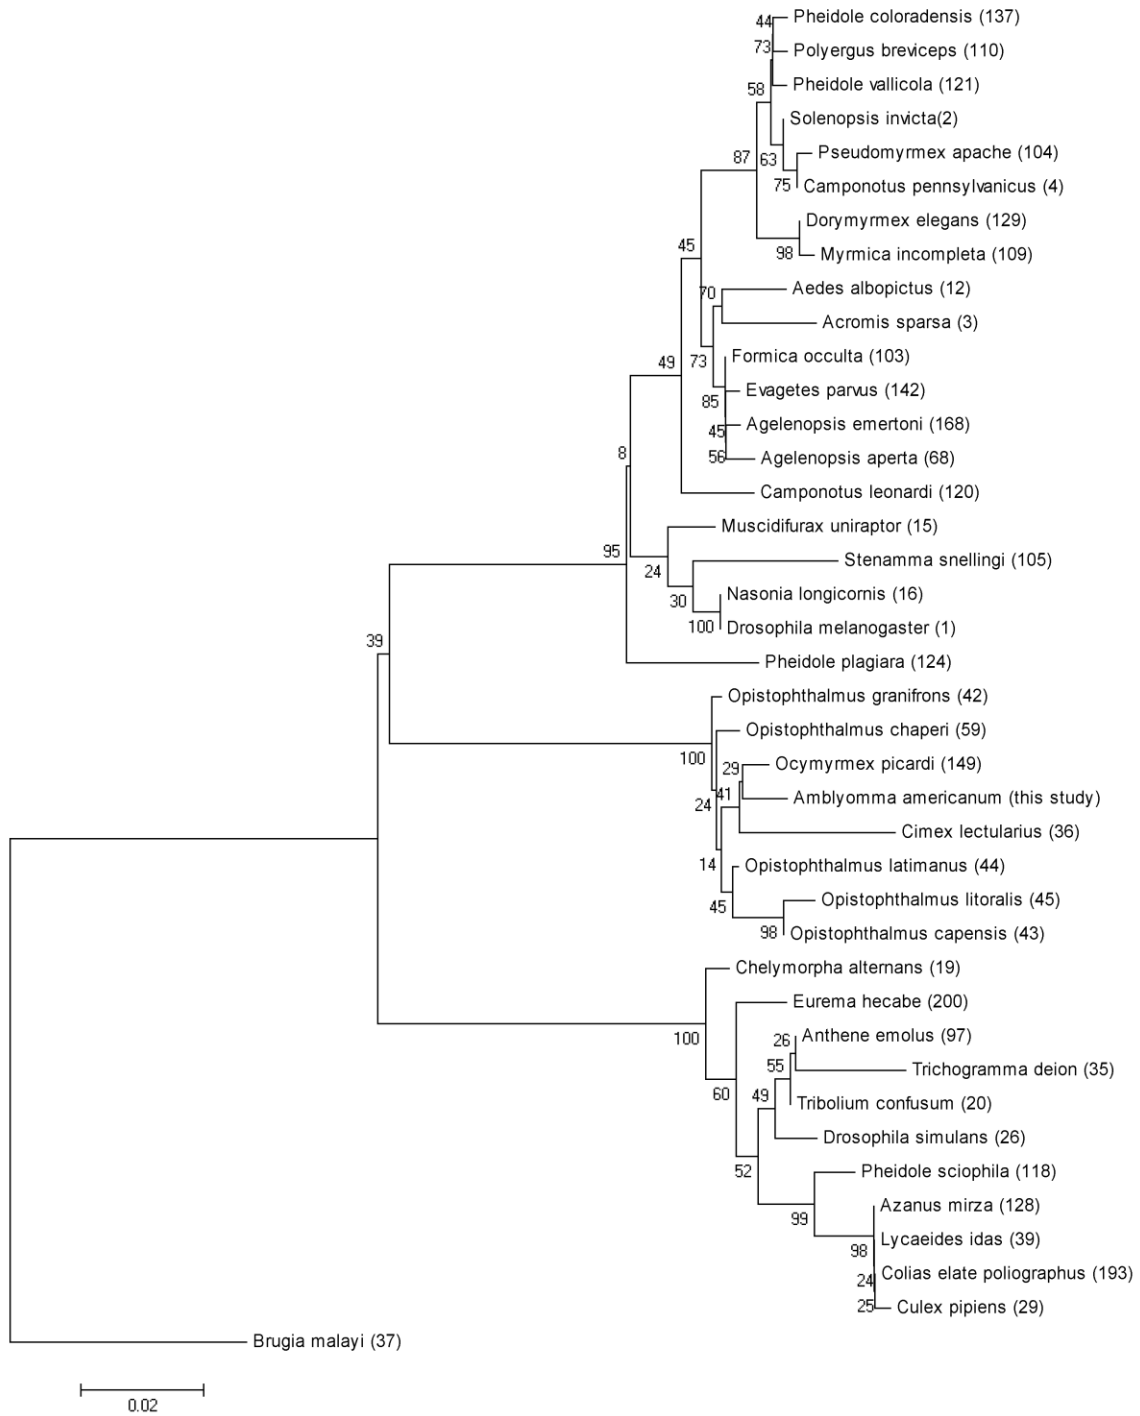

fbpA

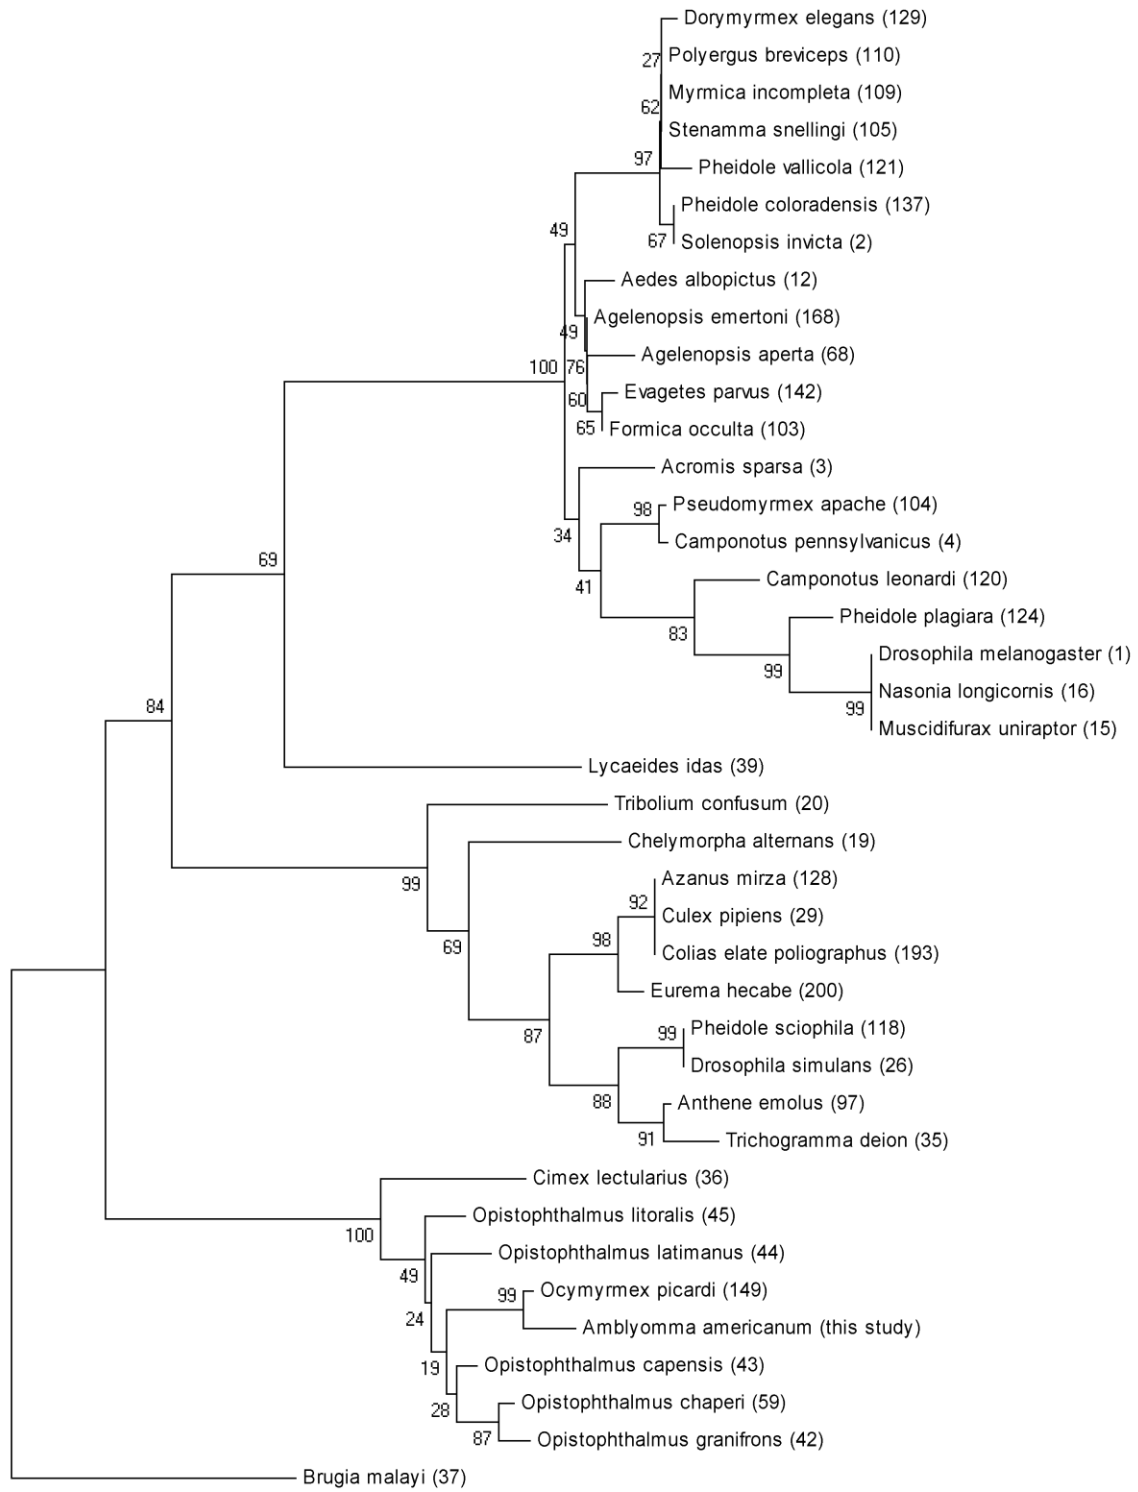

0.02

ftsZ

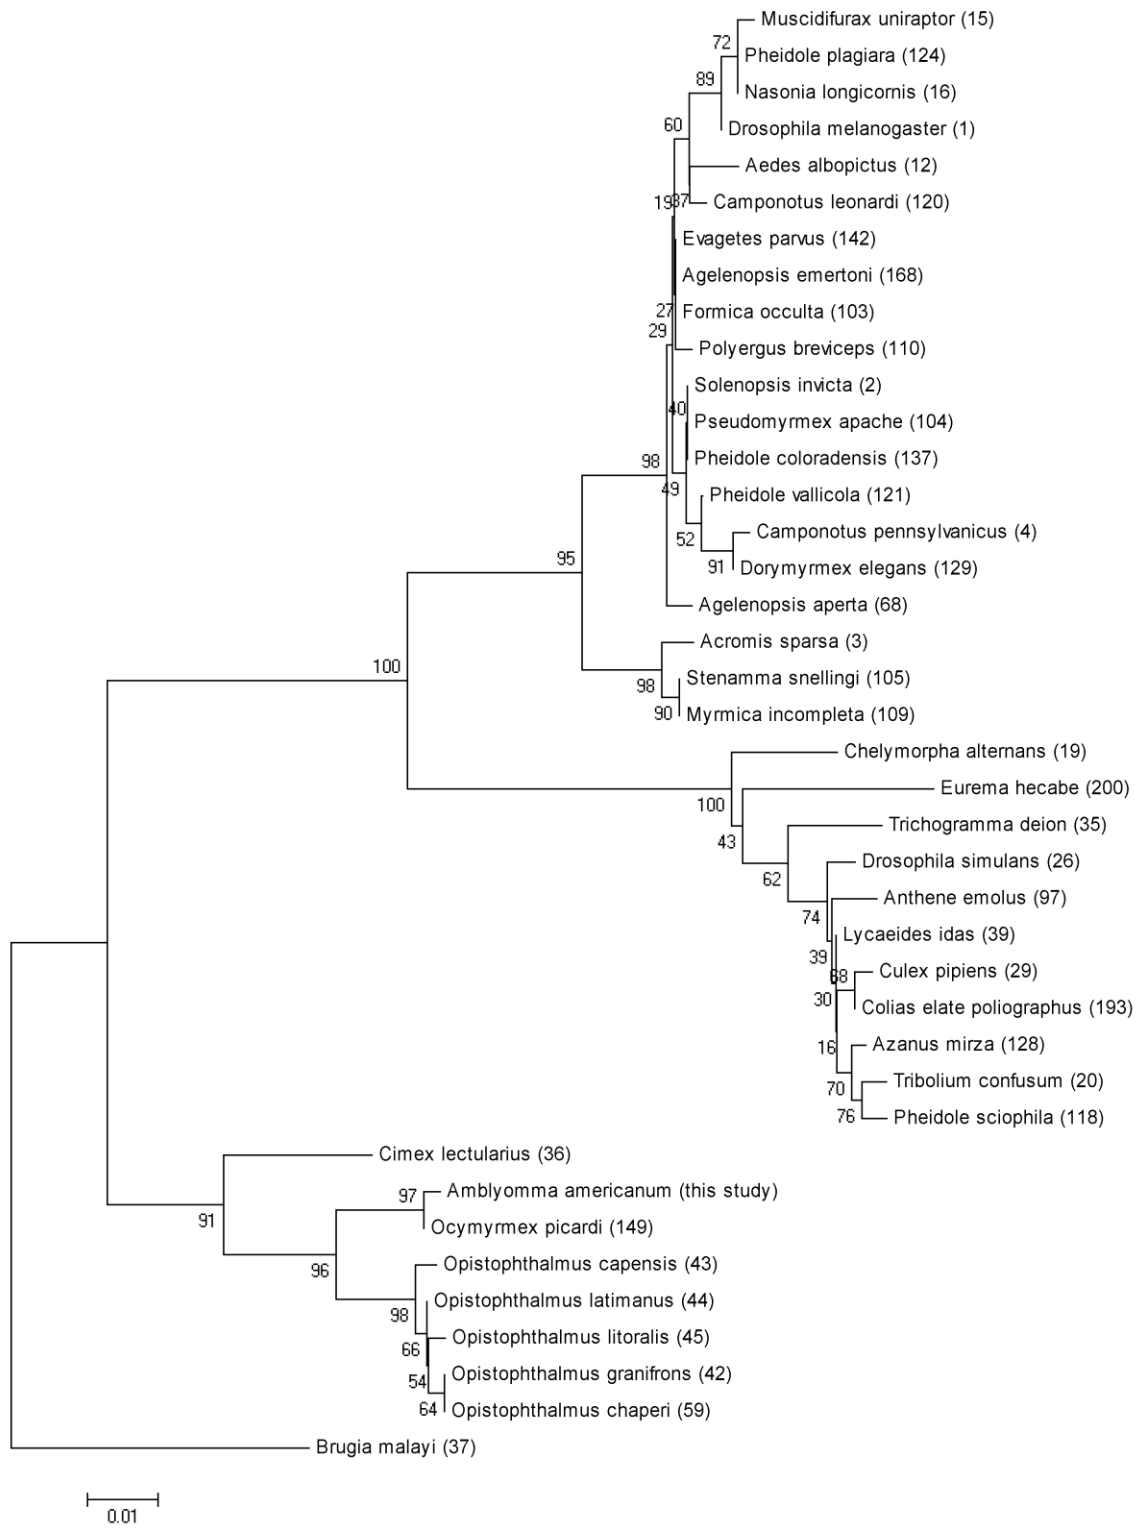

Supplement: NIHMS606283-supplement-Supplementary_Data.pdf [file NIHMS606283-supplement-Supplementary_Data.pdf]
